# Supplementary material for: A Novel Flavi-like Virus in Alfalfa (Medicago sativa L.) Crops along the Snake River Valley
Source: MDPI journal article supplement (doi:10.3390/v14061320), 2022-06-16
Supplement: s1 [file s1]

**Supplemental Table S4.** RT-PCR based testing of individual alfalfa samples collected in 2020 and in 2021. For multicomponent virus genomes, only one genome component was tested for as indicated. Numerator, “+” indicates virus-positive status determined by RT-PCR, “-” indicates virus-negative status; denominator, “+” indicates the PCR product was sequenced and found 98.5-100% identical to the virus sequence. Samples are divided in three groups by the date of collection.

| Viruses                  | AMV-R2 | BLRV | MsAPV1-R1 | MsAPV2-R1 | MsDPV1-R1 | MsAV1 | SRAV |
|--------------------------|--------|------|-----------|-----------|-----------|-------|------|
| <i>July 2020 samples</i> |        |      |           |           |           |       |      |
| ALF1059                  | +/+    | +/+  | +/+       | -         | +/+       | +/+   | -    |
| ALF1060                  | +/+    | -    | +/+       | +/+       | -         | +/+   | +/+  |
| ALF1061                  | +/+    | +/+  | +/+       | -         | +/+       | +/+   | +/+  |
| ALF1063                  | +/+    | -    | +/+       | +/+       | -         | +/+   | +/+  |
| ALF1067                  | +/+    | +/+  | +/+       | -         | -         | +/+   | -    |
| ALF1071                  | +/+    | +/+  | +/+       | -         | +/+       | -     | +/+  |
| <i>July 2021 samples</i> |        |      |           |           |           |       |      |
| 4B#1                     | -      | +/+  | +/+       | +/+       | -         | -     | -    |
| 4B#2                     | -      | -    | +/+       | +/+       | +/+       | +/+   | -    |
| 4B#3                     | -      | +/+  | +/+       | -         | -         | -     | +/+  |
| 4B#4                     | -      | -    | +/+       | -         | +/+       | +/+   | +/+  |
| 4B#5                     | -      | -    | +/+       | -         | +/+       | -     | +/+  |
| 7C#1                     | +/+    | +/+  | +/+       | +/+       | -         | -     | +/+  |
| 7C#2                     | +/+    | +/+  | +/+       | -         | -         | -     | +/+  |
| 7C#3                     | +/+    | +/+  | +/+       | -         | -         | +/+   | +/+  |
| 7C#4                     | +/+    | +/+  | +/+       | +/+       | -         | -     | +/+  |
| 7C#5                     | +/+    | -    | +/+       | -         | +/+       | +/+   | -    |
| 14B#1                    | -      | -    | -         | -         | -         | -     | -    |
| 14B#2                    | -      | -    | +/+       | -         | +/+       | +/+   | -    |
| 14B#3                    | -      | -    | -         | -         | +/+       | +/+   | -    |
| 14B#4                    | -      | -    | +/+       | -         | +/+       | +/+   | +/+  |
| 14B#5                    | -      | -    | +/+       | +/+       | +/+       | -     | +/+  |
| 23S#1                    | +/+    | -    | +/+       | +/+       | -         | -     | -    |
| 23S#2                    | -      | +/+  | +/+       | -         | -         | +/+   | +/+  |

|                            |     |     |     |     |     |     |     |
|----------------------------|-----|-----|-----|-----|-----|-----|-----|
| 23S#3                      | -   | -   | +/+ | -   | -   | -   | +/+ |
| 23S#4                      | -   | +/+ | +/+ | -   | +/+ | -   | +/+ |
| 23S#5                      | -   | +/+ | +/+ | -   | -   | +/+ | -   |
| 59A#1                      | -   | +/+ | +/+ | -   | -   | -   | +/+ |
| 59A#2                      | +/+ | +/+ | +/+ | -   | -   | +/+ | +/+ |
| 59A#3                      | +/+ | +/+ | +/+ | +/+ | -   | -   | -   |
| 59A#4                      | +/+ | +/+ | +/+ | -   | -   | -   | -   |
| 59A#5                      | -   | +/+ | +/+ | -   | -   | -   | +/+ |
| <i>August 2021 samples</i> |     |     |     |     |     |     |     |
| Aphids4B                   | -   | +/+ | -   | -   | -   | -   | -   |
| Thrips4B                   | +/+ | +/+ | +/+ | -   | -   | -   | -   |
| Thrips14B                  | +/+ | +/+ | +/+ | -   | -   | -   | +/+ |
| 4B-1                       | +/+ | +/+ | +/+ | +/+ | +/+ | -   | -   |
| 4B-2                       | +/+ | +/+ | +/+ | +/+ | +/+ | +/+ | -   |
| 4B-3                       | +/+ | +/+ | +/+ | -   | +/+ | +/+ | -   |
| 4B-4                       | +/+ | +/+ | +/+ | -   | -   | -   | +/+ |
| 4B-5                       | -   | +/+ | +/+ | +/+ | -   | +/+ | -   |
| 14B-1                      | +/+ | +/+ | +/+ | -   | +/+ | -   | -   |
| 14B-2                      | -   | +/+ | +/+ | -   | -   | -   | +/+ |
| 14B-3                      | -   | +/+ | +/+ | +/+ | -   | -   | -   |
| 14B-4                      | -   | +/+ | +/+ | +/+ | -   | -   | +/+ |
| 14B-5                      | +/+ | +/+ | +/+ | -   | -   | -   | -   |
