# Supplementary material for: A Novel Flavi-like Virus in Alfalfa (Medicago sativa L.) Crops along the Snake River Valley
Source: MDPI journal article supplement (doi:10.3390/v14061320), 2022-06-16
Supplement: s1 [file s1]

Probab=93.86 E-value=1.5 Score=36.69 Aligned\_cols=105 Identities=19% Similarity=0.149 Sum\_probs=0.0 Template\_Neff=9.700

|                  |      |                                           |             |
|------------------|------|-------------------------------------------|-------------|
| Q ss_pred        |      | EeEeCccCceEEEEeCccCccEEcCCcCceeee         |             |
| Q SRAV           | 1864 | RNVYKTDSDRYMVVSVDVMNYGGYSGGPVVTSDGEFLGIC  | 1903 (3835) |
| Q Consensus      | 1864 | rnvkyktdsdrymvvsvdvmnyggysggpvvtsdgeflgic | 1903 (3835) |
|                  |      | .....+. .....+ . .     ++..+ +++  .       |             |
| T Consensus      | 189  | g~~~~~-----G~SGgpv~~~~G~viGi~             | 224 (296)   |
| T RPOA_LDVC/1418 | 189  | GLSLDLLGKNSAFCFTK---CGDSGSPVVEDEGNLLGIH   | 224 (296)   |
| T ss_pred        |      | EeccccCCCeEeeeC---CCCCcEECCCCCEEEE        |             |
