# Supplementary figures and images for: A Novel Flavi-like Virus in Alfalfa (Medicago sativa L.) Crops along the Snake River Valley
Source: MDPI journal article supplement (doi:10.3390/v14061320), 2022-06-16

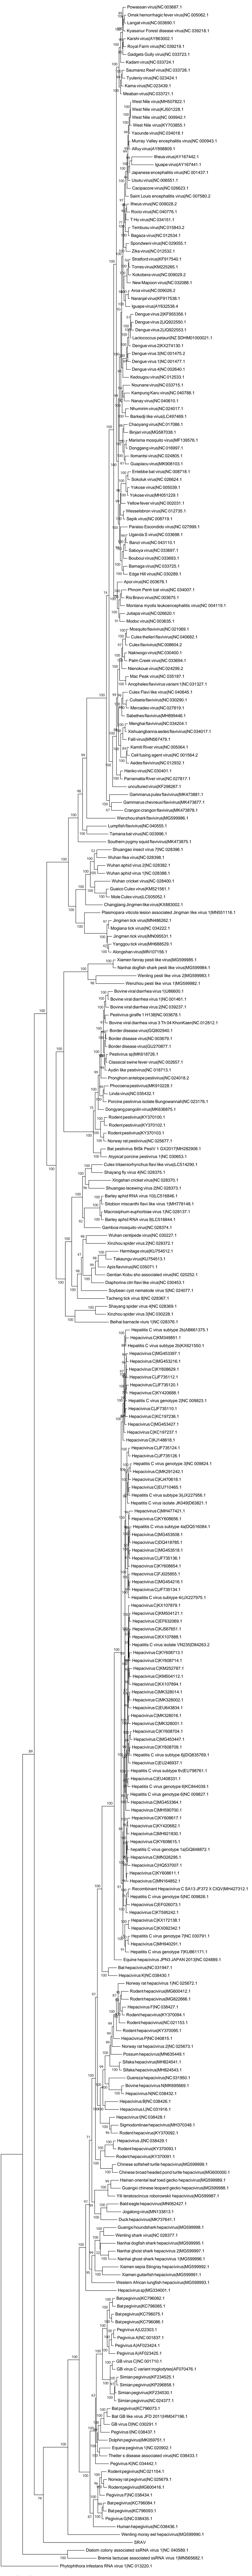

Supplement: s1 [file s1]
